# Supplementary material for: Occupation and SARS-CoV-2 in Europe: a review
Source: PubMed Central journal article supplement — Eur Respir Rev. 2024 Sep 18;33(173):240044. doi: 10.1183/16000617.0044-2024 (PMC11409055; doi:10.1183/16000617.0044-2024), 2024-09-18

Table S1. Effect estimates and evidence for Transport sector

| Outcome                          | Study                                                                                                                                                                      | Subgroups                                                                                                                                                      | Wave 1<br>Jan 2020 to Nov<br>2020                                                                              | Wave 2<br>Dec 2020<br>to May<br>2021 | Wave 3<br>June 2021 to<br>Nov 2021 | Wave 4<br>Dec 2021<br>onwards |
|----------------------------------|----------------------------------------------------------------------------------------------------------------------------------------------------------------------------|----------------------------------------------------------------------------------------------------------------------------------------------------------------|----------------------------------------------------------------------------------------------------------------|--------------------------------------|------------------------------------|-------------------------------|
| SARS-CoV-2<br>infection          | Airoldi 2021<br>(Italy)                                                                                                                                                    | Transportation                                                                                                                                                 |                                                                                                                | NA                                   | NA                                 | NA                            |
|                                  | Ballering 2021<br>(Netherlands)                                                                                                                                            |                                                                                                                                                                | NA                                                                                                             | NA                                   | NA                                 | NA                            |
|                                  | Beale 2023<br>(UK)                                                                                                                                                         | Transport and mobile machine                                                                                                                                   | 1.1(0.7 to 1.5)                                                                                                |                                      | 1.0(0.7 to 1.5)                    | 0.8(0.6 to 1.1)               |
|                                  | Biarnes-<br>Martinez                                                                                                                                                       |                                                                                                                                                                | NA                                                                                                             | NA                                   | NA                                 | NA                            |
|                                  | Bonde 2023<br>(Denmark)                                                                                                                                                    | Bus and tram drivers<br>Transport conductors                                                                                                                   | 1.5(1.3 to 1.6)<br>1.5(1.2 to 1.9)                                                                             |                                      |                                    |                               |
|                                  | Green 2023<br>(UK)                                                                                                                                                         | Transport (incl. storage,<br>logistic)                                                                                                                         | 1.2(1.0 to 1.4)                                                                                                |                                      | NA                                 | NA                            |
|                                  | Magnusson<br>2021 (Norway)                                                                                                                                                 | Transport conductor                                                                                                                                            | 0.6 (0.2 to 2.2)                                                                                               | 1.8 (1.2 to 2.8)                     | NA                                 | NA                            |
|                                  |                                                                                                                                                                            | Travel steward                                                                                                                                                 | 0.8 (0.3 to 1.8)                                                                                               | 1.6 (1.2 to 2.3)                     |                                    |                               |
|                                  |                                                                                                                                                                            | Bus or tram driver                                                                                                                                             | 2.0 (1.7 to 2.5)                                                                                               | 1.4 (1.2 to 1.5)                     |                                    |                               |
|                                  |                                                                                                                                                                            | Taxi driver                                                                                                                                                    | 1.2 (1.0 to 1.4)                                                                                               | 1.2 (1.1 to 1.3)                     |                                    |                               |
| Reuter 2022<br>(Germany)         |                                                                                                                                                                            | NA                                                                                                                                                             | NA                                                                                                             | NA                                   | NA                                 |                               |
| Rhodes 2022<br>(UK)              | Transport                                                                                                                                                                  | 1.3(1.2 to 1.5)                                                                                                                                                |                                                                                                                | 1.0(0.9 to 1.1)                      | 1.0(1.0 to 1.1)                    |                               |
| Verbeeck 2021<br>(Belgium)       | Transport and storage                                                                                                                                                      |                                                                                                                                                                | NA                                                                                                             | NA                                   | NA                                 |                               |
| Hospitalisation with<br>COVID-19 | Bonde (2022)<br>(Denmark)#                                                                                                                                                 | Heavy Truck and Lorry<br>Drivers<br>Bus and Tram Drivers<br>Car, Taxi and Van Drivers<br>Locomotive Engine Drivers<br>Travel Attendants and Travel<br>Stewards | 0.84 (0.52 to 1.36)<br>2.46 (1.79 to 3.40)<br>1.6 (0.94 to 2.70)<br>1.23 (0.58 to 2.61)<br>0.63 (0.15 to 2.58) |                                      |                                    |                               |
|                                  | Mutambudzi<br>(2020)<br>(England)                                                                                                                                          | Transport workers                                                                                                                                              | 1.43<br>(0.78 to 2.63)                                                                                         | NA                                   | NA                                 | NA                            |
| COVID-19<br>mortality            | Billingsley<br>2022 (Sweden)                                                                                                                                               | Taxi/bus                                                                                                                                                       | 1.41(0.8 to 2.5)                                                                                               | NA                                   | NA                                 | NA                            |
|                                  | Cherrie 2022<br>(UK)                                                                                                                                                       | Taxi and cab drivers and<br>chauffeurs                                                                                                                         | 2.4(1.0 to 3.0)                                                                                                | 3.1(2.6 to 3.8)                      | 1.7(1.3 to 2.3)                    | 1.0(0.6 to 1.8)               |
|                                  |                                                                                                                                                                            | Bus and coach drivers                                                                                                                                          | 1.8(1.4 to 2.5)                                                                                                | 2.4(1.9 to 3.1)                      | 1.4(0.9 to 2.3)                    | 1.5(0.9 to 2.7)               |
|                                  | Matz 2023<br>(UK)                                                                                                                                                          |                                                                                                                                                                | NA                                                                                                             | NA                                   | NA                                 | NA                            |
| Nafilyan 2021<br>(UK)            | Taxi and cab drivers and<br>chauffeurs - Male<br>Taxi and cab drivers and<br>chauffeurs<br>-Female<br>Bus and coach drivers<br>- Male<br>Bus and coach drivers<br>- Female | 1.4(1.1 to 1.7)<br>2.5(1.0 to 5.9)<br>1.1(0.9 to 1.5)<br>1.7(0.7 to 4.1)                                                                                       | NA                                                                                                             | NA                                   | NA                                 |                               |

Key: deep red = evidence of highly elevated risks, red= evidence of moderately elevated risks, green= evidence of reduced risks, blue= unclear whether risks are reduced or increased, yellow=varies by subgroup

Table S2. Effect estimates and evidence for Food production and retail sector

| Outcome                       | Study                                                                                                                              | Subgroups                                                                                                                                        | Wave 1<br>Jan 2020 to<br>Nov 2020                                                                                  | Wave 2<br>Dec 2020 to<br>May 2021                        | Wave 3<br>June 2021<br>to Nov<br>2021 | Wave 4<br>Dec 2021<br>onwards |
|-------------------------------|------------------------------------------------------------------------------------------------------------------------------------|--------------------------------------------------------------------------------------------------------------------------------------------------|--------------------------------------------------------------------------------------------------------------------|----------------------------------------------------------|---------------------------------------|-------------------------------|
|                               | Airoldi 2021 (Italy)                                                                                                               | Food industry                                                                                                                                    |                                                                                                                    | NA                                                       | NA                                    | NA                            |
|                               |                                                                                                                                    | Food industry (meat)                                                                                                                             |                                                                                                                    |                                                          |                                       |                               |
|                               | Ballering 2021 (Netherlands)                                                                                                       |                                                                                                                                                  | NA                                                                                                                 | NA                                                       | NA                                    | NA                            |
|                               | Beale 2023 (UK)                                                                                                                    | Food preparation and hospitality workers                                                                                                         | 1.82 (1.2 to 2.8)                                                                                                  |                                                          | 1.0(0.6 to 1.9)                       | 0.7(0.3 to 1.3)               |
|                               | Biarnes-Martinez 2022 (Spain)                                                                                                      |                                                                                                                                                  | NA                                                                                                                 | NA                                                       | NA                                    | NA                            |
|                               | Bonde 2023 (Denmark)                                                                                                               | Waiters<br>Food service counter attendants<br>Bartenders<br>Restaurant managers<br>Hotel managers<br>Food and related products machine operators | 1.5(1.4 to 1.6)<br>1.3(1.1 to 1.5)<br><br>1.6(1.3 to 1.9)<br>1.3(1.0 to 1.7)<br>1.5(1.0 to 2.2)<br>2.0(1.8 to 2.2) |                                                          |                                       |                               |
|                               | Green 2023 (UK)                                                                                                                    | Food production, agriculture, farming<br>Hospitality (hotel, restaurant)                                                                         | 0.9(0.7 to 1.2)<br><br>1.3(1.1 to 1.5)                                                                             |                                                          | NA                                    | NA                            |
|                               | Magnusson 2021 (Norway)                                                                                                            | Bartender<br><br>Waiter<br><br>Food counter attendant                                                                                            | 0.9 (0.6 to 1.3)<br>0.8 (0.7 to 0.9)<br>0.9 (0.7 to 1.2)                                                           | 2.0 (1.8 to 2.2)<br>1.5 (1.4 to 1.6)<br>1.4 (1.3 to 1.5) | NA                                    | NA                            |
|                               | Reuter 2022 (Germany)                                                                                                              | Selling goods and foodstuffs                                                                                                                     | 1.5(0.5 to 6.5)                                                                                                    | NA                                                       | NA                                    | NA                            |
|                               | Rhodes 2022 (UK)                                                                                                                   | Food                                                                                                                                             | 1.1(1.0 to 1.3)                                                                                                    |                                                          | 0.9(0.8 to 1.0)                       | 1.0(1.0 to 1.1)               |
| Verbeeck 2021 (Belgium)       | Food and beverage service                                                                                                          |                                                                                                                                                  | NA                                                                                                                 | NA                                                       | NA                                    |                               |
| Hospitalisation with COVID-19 | Bonde (2022) (Denmark)                                                                                                             | Cooks<br>Waiters and Bartenders<br>Kitchen Helpers<br>Fast Food Preparers                                                                        | 0.5 (0.2 to 1.0)<br>0.7 (0.3 to 1.3)<br>0.9 (0.5 to 1.6)<br>0.4 (0.1 to 1.5)                                       |                                                          |                                       |                               |
|                               | Mutambudzi (2020) (England)                                                                                                        | Food workers                                                                                                                                     | 0.8 (0.4 to 1.8)                                                                                                   | NA                                                       | NA                                    | NA                            |
| COVID-19 mortality            | Billingsley 2022 (Sweden)                                                                                                          | Meat packers                                                                                                                                     | No deaths                                                                                                          | NA                                                       | NA                                    | NA                            |
|                               | Cherrie 2022 (UK)                                                                                                                  | Food production                                                                                                                                  | 1.3(1.0 to 1.8)                                                                                                    | 1.2(0.9 to 1.4)                                          | 1.2(0.7 to 1.6)                       | 1.0(0.5 to 1.5)               |
|                               |                                                                                                                                    | Food retail and distribution                                                                                                                     | 1.2(1.1 to 1.5)                                                                                                    | 1.5(1.3 to 1.6)                                          | 1.1(0.9 to 1.3)                       | 1.1(0.7 to 1.4)               |
|                               | Matz 2023 (UK)                                                                                                                     |                                                                                                                                                  | NA                                                                                                                 | NA                                                       | NA                                    | NA                            |
| Nafilyan 2021 (UK)            | Food production – Male<br>Food production – Female<br>Food retail and distribution – Male<br>Food retail and distribution - Female | 1.2(0.9 to 1.5)<br>1.2(0.8 to 1.8)<br><br>1.1(1.0 to 1.3)<br>1.0(0.9 to 1.2)                                                                     | NA                                                                                                                 | NA                                                       | NA                                    |                               |

Key: deep red = evidence of highly elevated risks, red= evidence of moderately elevated risks, green= evidence of reduced risks, blue= unclear whether risks are reduced or increased, yellow=varies by subgroup

Table S3. Newcastle-Ottawa Scale for quality assessment of selected cohort studies for the scoping review.

| Study                 | Selection                                   |                                        |                              |                                                                             | Comparability                                                      | Outcome                  |                                                         |                                  |
|-----------------------|---------------------------------------------|----------------------------------------|------------------------------|-----------------------------------------------------------------------------|--------------------------------------------------------------------|--------------------------|---------------------------------------------------------|----------------------------------|
|                       | 1. Representativeness of the exposed cohort | 2. Selection of the non-exposed cohort | 3. Ascertainment of exposure | 4. Demonstration that outcome of interest was not present at start of study | 1. Comparability of cohorts on the basis of the design or analysis | 1. Assessment of outcome | 2. Was the follow-up long enough for outcomes to occur? | 3. Adequacy of follow-up cohorts |
| Airoldi 2021          | -                                           | *                                      | -                            | *                                                                           | -                                                                  | *                        | *                                                       | *                                |
| Balling 2021          | *                                           | *                                      | -                            | *                                                                           |                                                                    | *                        | *                                                       | *                                |
| Beale 2023            | -                                           | *                                      | -                            | *                                                                           | **                                                                 | -                        | *                                                       | *                                |
| Biarnes-Martinez 2022 | -                                           | -                                      | -                            | *                                                                           | -                                                                  | *                        | *                                                       | *                                |
| Billingsley 2022      | *                                           | *                                      | -                            | *                                                                           | **                                                                 | -                        | *                                                       | *                                |
| Bonde 2022            | *                                           | *                                      | *                            | *                                                                           | **                                                                 | *                        | *                                                       | *                                |
| Bonde 2023            | *                                           | *                                      | *                            | *                                                                           | **                                                                 | *                        | *                                                       | *                                |
| Cherrie 2022          | *                                           | *                                      | -                            | *                                                                           | *                                                                  | *                        | *                                                       | *                                |
| Green 2023            | *                                           | *                                      | -                            | *                                                                           | **                                                                 | *                        | *                                                       | *                                |
| Matz 2023             | *                                           | *                                      | -                            | *                                                                           | *                                                                  | *                        | *                                                       | *                                |
| Magnusson 2021        | *                                           | *                                      | *                            | *                                                                           | **                                                                 | *                        | *                                                       | *                                |
| Mutambuzi 2020        | -                                           | *                                      | -                            | *                                                                           | **                                                                 | *                        | *                                                       | *                                |
| Nafilyan 2021         | *                                           | *                                      | -                            | *                                                                           | **                                                                 | *                        | *                                                       | *                                |
| Nwaru 2022            | *                                           | *                                      | -                            | *                                                                           | **                                                                 | *                        | *                                                       | *                                |
| Reuter 2022           | *                                           | *                                      | -                            | *                                                                           | **                                                                 | *                        | *                                                       | *                                |
| Rhodes 2022           | *                                           | *                                      | -                            | *                                                                           | **                                                                 | *                        | *                                                       | *                                |
| Verbeek 2021          | *                                           | *                                      | *                            | *                                                                           | -                                                                  | *                        | *                                                       | *                                |

Table S4. Methods of exposure measurement and outcome measurement

|                       | <b>Method of ascertaining occupation exposure group</b>                                                                                       | <b>Method of ascertaining outcome</b>                                                                                                     |
|-----------------------|-----------------------------------------------------------------------------------------------------------------------------------------------|-------------------------------------------------------------------------------------------------------------------------------------------|
| Airoldi 2021          | Occupational sector classified by local expert from company details                                                                           | Antibody test from worker screening programme                                                                                             |
| Ballering 2021        | Self reported                                                                                                                                 | Self-reported positive PCR test or a self-reported clinical diagnosis of COVID-19 by a physician based on participants' symptoms          |
| Beale 2023            | 4-digit SOC codes generated from self reported job title used to generate bespoke groups.                                                     | Self-reported PCR or lateral flow test with study-specific antibody tests for a sub-sample.                                               |
| Biarnes-Martinez 2022 | Occupation from previous sick leave report in primary care database (excluded if no previous sick-leave).                                     | Positive PCR recorded in database of diagnoses                                                                                            |
| Billingsley 2022      | 3-digit SSYK codes used to generate bespoke groups                                                                                            | Death associated with COVID-19 on death register                                                                                          |
| Bonde 2022            | 4-digit DISCO code used to generate one-digit and two-digit divisions, from national register                                                 | Positive PCR-test at accredited laboratory. Testing offered free of charge to all residents regardless of symptoms from Aug 2020 onwards. |
| Bonde 2023            | 4-digit DISCO code used to generate bespoke groups                                                                                            | Hospital admission of $\geq 12$ hours in combination with a positive PCR test up to 14 days prior to admission.                           |
| Cherrie 2022          | 4-digit SOC codes from death certificate used to generate bespoke groups                                                                      | COVID-19 mentioned on death certificate                                                                                                   |
| Green 2023            | ONS 15 sector codes                                                                                                                           | Positive PCR test via a study specific monthly test                                                                                       |
| Matz 2023             | 4-digit SOC codes from death certificate used to generate bespoke groups                                                                      | Death by any cause from ONS death registry                                                                                                |
| Magnusson 2021        | 7-digit STYRK-98 code used to generate bespoke groups                                                                                         | Positive PCR test or diagnosis of confirmed COVID-19 or hospitalisation for COVID-19 in medical records                                   |
| Mutambudzi 2020       | 4-digit SOC codes generated from self reported job title used to generate bespoke groups                                                      | Positive test result for SARS-CoV-2 in a hospital setting or death with a primary or contributory cause reported as COVID-19              |
| Nafilyan 2021         | 4-digit SOC codes from death certificate/census used to generate bespoke groups                                                               | COVID-19 mentioned on death certificate                                                                                                   |
| Nwaru 2022            | 3-digit SSYK codes used to generate bespoke groups                                                                                            | Positive PCR recorded on database of notifiable diseases or primary care records or cause of death register or intensive care register    |
| Reuter 2022           | 5-digit German Classification of occupations generated from self-reported job title used to generate bespoke groups.                          | Self-reported positive test result                                                                                                        |
| Rhodes 2022           | 4-digit SOC codes generated from self reported job title used to generate major categories and bespoke groups. ONS 15 sector codes also used. | Positive PCR test via a study specific monthly test                                                                                       |
| Verbeeck 2021         | NACE-BEL codes from employee database (level 1, 2 or 3 groups depending on number of employees)                                               | Confirmed cases on a national register                                                                                                    |

SOC=Standard Occupational Classification. ONS=Office of National Statistics. DISCO=Danish International Standard Classification of Occupations. SSYK=Swedish Standard Occupational Classification.

Table S5 Inclusion/exclusion criteria

| <b>Inclusion criteria</b>                                                                                                     | <b>Exclusion criteria</b>                             |
|-------------------------------------------------------------------------------------------------------------------------------|-------------------------------------------------------|
| General population cohort                                                                                                     | Data on single work sector only                       |
| Outcome of SARS-CoV-2 infection, hospitalisation due to COVID-19 or COVID-19 mortality                                        | Exposure based on Job Exposure Matrix categories only |
| Published in a peer-reviewed journal                                                                                          | Studies using only long COVID as an outcome           |
| Reporting data comparing outcomes in two or more sector groups to a reference category (general population or low-risk group) |                                                       |
| Population based in Europe                                                                                                    |                                                       |

**Figure S1: Flow chart of study inclusion**

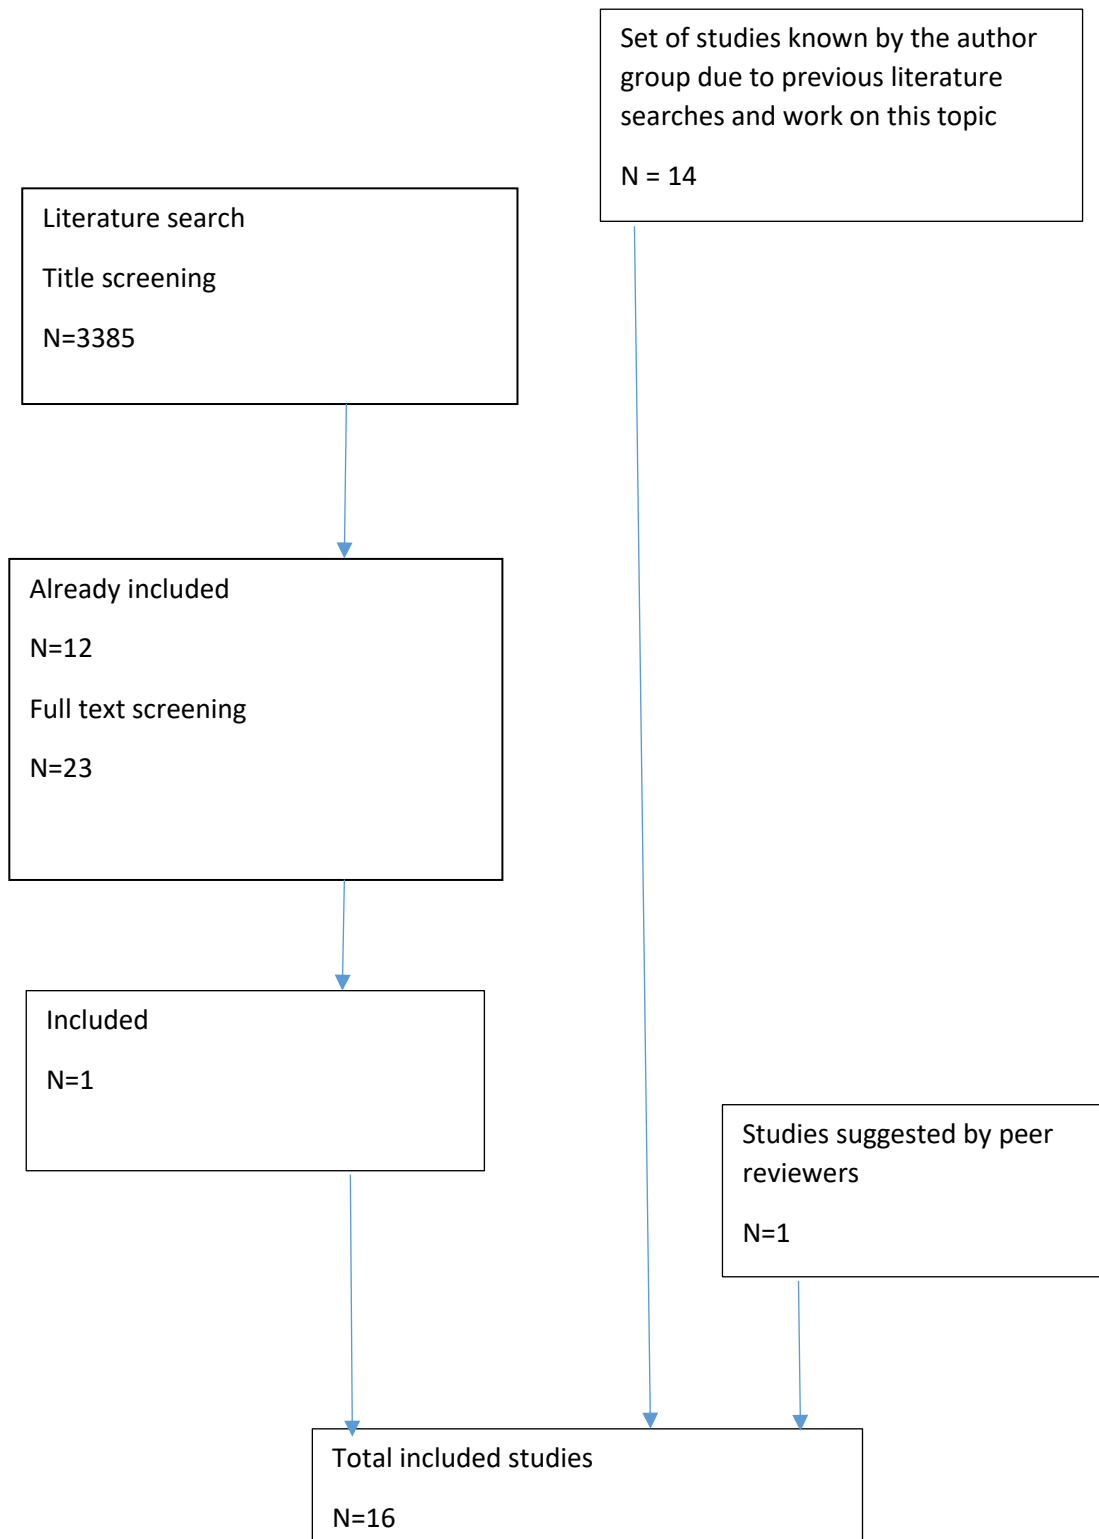

Supplement: ERR-0044-2024.SUPPLEMENT.pdf [file ERR-0044-2024.SUPPLEMENT.pdf]
